# Supplementary material for: Cryo-EM structure of the benzodiazepine-sensitive α1β1γ2S tri-heteromeric GABAA receptor in complex with GABA
Source: eLife journal article supplement (doi:10.7554/elife.39383), 2018-07-25
Supplement: supp [file elife-39383-supp-v1.zip]

|          |     |    | <u>β4</u> | <u>β5</u> | <u>β5'</u>  | <u>β6</u>                |
|----------|-----|----|-----------|-----------|-------------|--------------------------|
| GABA_α1  | 119 | SK | WTP       | TF        | FFHNGKKSVAH | NMTMPNKLLRITEDGTLLYT     |
| GABA_α2  | 119 | SK | WTP       | TF        | FFHNGKKSVAH | NMTMPNKLLRIQDDGTLLYT     |
| GABA_α3  | 144 | SK | WTP       | TF        | FFHNGKKSVAH | NMTTPNKLLRLVDNGTLLYT     |
| GABA_α4  | 125 | TK | WTP       | TF        | FRNGKKS     | SVSHNMTAPNKLFRIMRNGTILYT |
| GABA_α5  | 126 | SK | WTP       | TF        | FFHNGKKSIAH | NMTTPNKLLRLEDDGTLLYT     |
| GABA_α6  | 109 | SK | WTP       | TF        | FRNGKKSIAH  | NMTTPNKLFRIMQNGTILYT     |
| GABA_β1  | 114 | DQ | WVP       | TY        | FLNDKKS     | FFVHGVTVKNRMIRLHPDGTVLYG |
| GABA_β2  | 113 | DQ | WVP       | TY        | FLNDKKS     | FFVHGVTVKNRMIRLHPDGTVLYG |
| GABA_β3  | 114 | DQ | WVP       | TY        | FLNDKKS     | FFVHGVTVKNRMIRLHPDGTVLYG |
| GABA_γ1  | 141 | GK | WIP       | TF        | FRNSRKS     | DAHWITTPNRLRIWNDGRVLYT   |
| GABA_γ2  | 143 | GK | WIP       | TF        | FRNSKKA     | DAHWITTPNRLRIWNDGRVLYT   |
| GABA_γ3  | 124 | GL | WIP       | TF        | FRNSKTA     | EAHWITTPNQLRIWNDGKILYT   |
| GABA_δ   | 117 | DK | WLP       | TF        | IVNAKSA     | WFHDVTVENKIRLQPDGVILYS   |
| GABA_ε   | 148 | SQ | WIP       | TF        | FRNSKR      | THEHEITMPNQMVRIYKDGKVLTY |
| GABA_θ   | 136 | EK | WVP       | CY        | FLNSKDA     | FVHDVTVENRVFQLHPDGTVRYG  |
| GABA_π   | 113 | EF | WVP       | TY        | IVESKKS     | SFLHEVTVGNRILRLFSNGTVLYA |
| GABA_ρ1  | 151 | KK | WVP       | MF        | FVHSKRS     | FIHDTTDDNVMLRVQPDGKVLYS  |
| GABA_ρ2  | 131 | KK | WVP       | MF        | FVHSKRS     | FTHDTTDDNIMLRVFPDGHVLYS  |
| GABA_ρ3  | 137 | RK | WVP       | MF        | FVHSKRS     | FIHDTTMENIMLRVHPDGNVLLS  |
| GlyR_α1  | 119 | DS | WKP       | LF        | FANEKGA     | HFHEITTDNKLLRISRNGNVLYS  |
| GlyR_α2  | 125 | DS | WKP       | LF        | FANEKGA     | NFHDTVTDNKLLRISKNGKVLYS  |
| GlyR_α3  | 124 | DS | WKP       | LF        | FANEKGA     | NFHEVTTDNKLLRIFKNGNVLYS  |
| GlyR_β   | 136 | KC | WKP       | LF        | FANEKSA     | NFHDTVQENILLFIFRDGDVLVS  |
| 5HT3A    | 113 | DS | WVP       | IL        | INEFVDV     | GKSPNIPY-VYIRH--QGEVQNY  |
| 5HT3B    | 111 | SA | WAP       | II        | INEFVDI     | ERYPDLPY-VYVNS--SGTIENY  |
| 5HT3C    | 118 | EN | WLP       | IF        | IVESMDV     | DQTPSGLT-AYISS--EGRIKYD  |
| 5HT3D    | 115 | EN | WLS       | VF        | IEES--      | VDQTPAGLM-ASMS-----      |
| 5HT3E    | 118 | KN | WLP       | IF        | IELMDV      | DKTPKGLT-AYVSN--EGRIRYK  |
| ACHA_α1  | 128 | EK | WRP       | LV        | LYNNADG     | DFAIVKFTKVLLQY--TGHITWT  |
| ACHA_α2  | 138 | EM | WRP       | IV        | LYNNADG     | EFAVTHMTKAHLFS--TGTVHWV  |
| ACHA_α3  | 114 | QK | WKP       | IV        | LYNNAVG     | DFQVDDKTKALLKY--TGEVTWI  |
| ACHA_α4  | 116 | EL | WRP       | IV        | LYNNADG     | FAVTHLTKAHLFH--DGRVQWT   |
| ACHA5_α5 | 126 | DS | WTP       | IV        | LFDNADG     | RFEGETSTKTVIRY--NGTVTWT  |
| ACHA_α6  | 113 | DK | WKP       | IV        | LYNNAVG     | DFQVEGKTKALLKY--NGMITWT  |
| ACHA_α7  | 105 | GQ | WKP       | IL        | LYNSAD      | ERFDATFHTNVLVNS--SGHCQYL |
| ACHA_α9  | 110 | DL | WRP       | IV        | LYNKAD      | DESSEPVNTNVVLR--DGLITWD  |
| ACHA_α10 | 109 | SL | WRP       | IV        | LYNKAD      | AQPPGSASTNVVLRH--DGAVRWD |
| ACHB_β1  | 106 | ES | WLP       | VV        | LLNNNDG     | NFDVALDISVVVSS--DGSVRWQ  |
| ACHB_β2  | 110 | KH | WLP       | VV        | LYNNADG     | MYEVSFYSSNAVVS--DGSIFWL  |
| ACHB_β3  | 108 | ES | WLP       | IV        | LFENADG     | RFEGLMTKVIVKS--NGTVVWT   |
| ACHB_β4  | 108 | KR | WLP       | IV        | LYNNADG     | TYEVSVYTNLIVRS--NGSVLWL  |
| ACHG_γ   | 105 | TM | WRP       | IV        | LENNVDG     | VFEVALYCNVLVSP--DGCYIWL  |
| ACHD_δ   | 106 | DM | WLP       | IV        | LENNNDG     | SFQISYSCNVLVYH-YGFVYWL   |

Figure 4-figure supplement 1
