# Supplementary figures and images for: Cryo-EM structure of the benzodiazepine-sensitive α1β1γ2S tri-heteromeric GABAA receptor in complex with GABA
Source: eLife journal article supplement (doi:10.7554/elife.39383), 2018-07-25

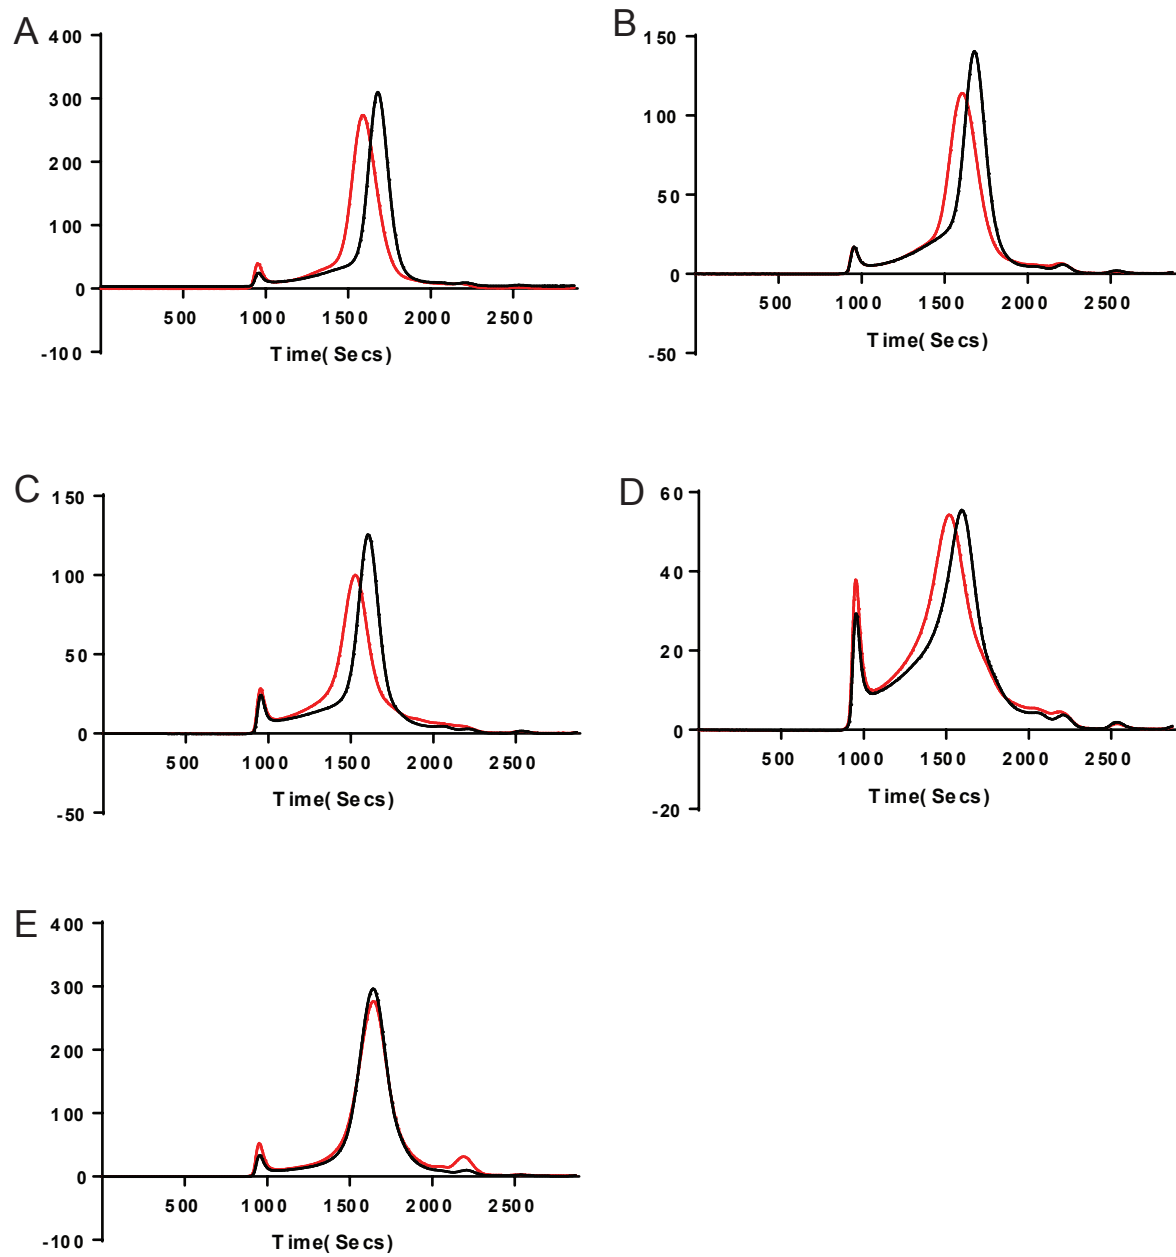

Figure 1-figure supplement 2

Supplement: supp [file elife-39383-supp-v1.zip]

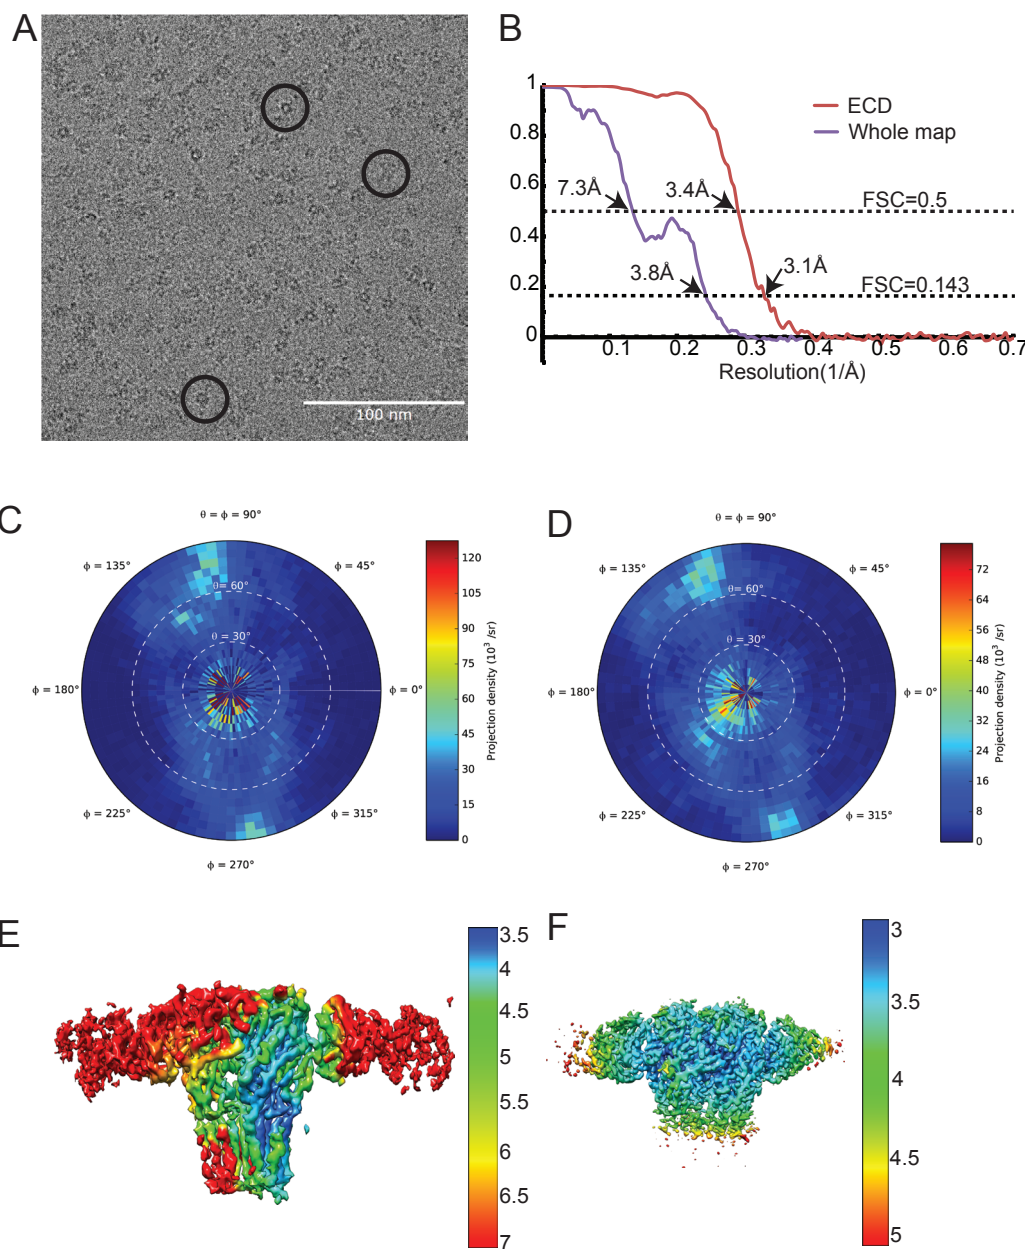

Figure 1-figure supplement 5

Supplement: supp [file elife-39383-supp-v1.zip]

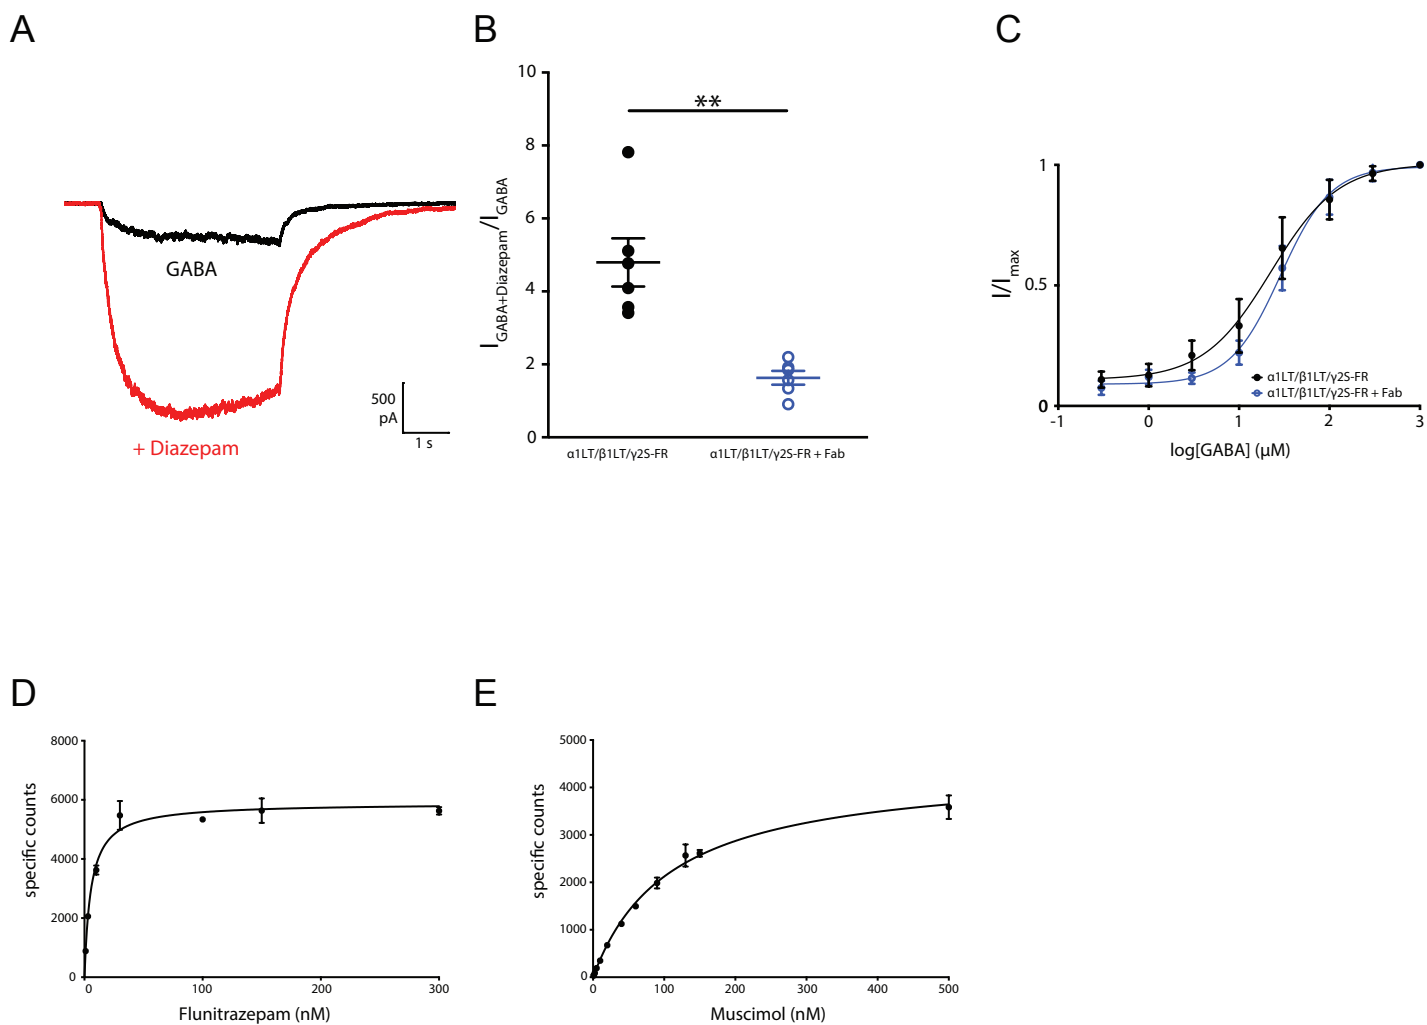

Figure 1-figure supplement 3

Supplement: supp [file elife-39383-supp-v1.zip]

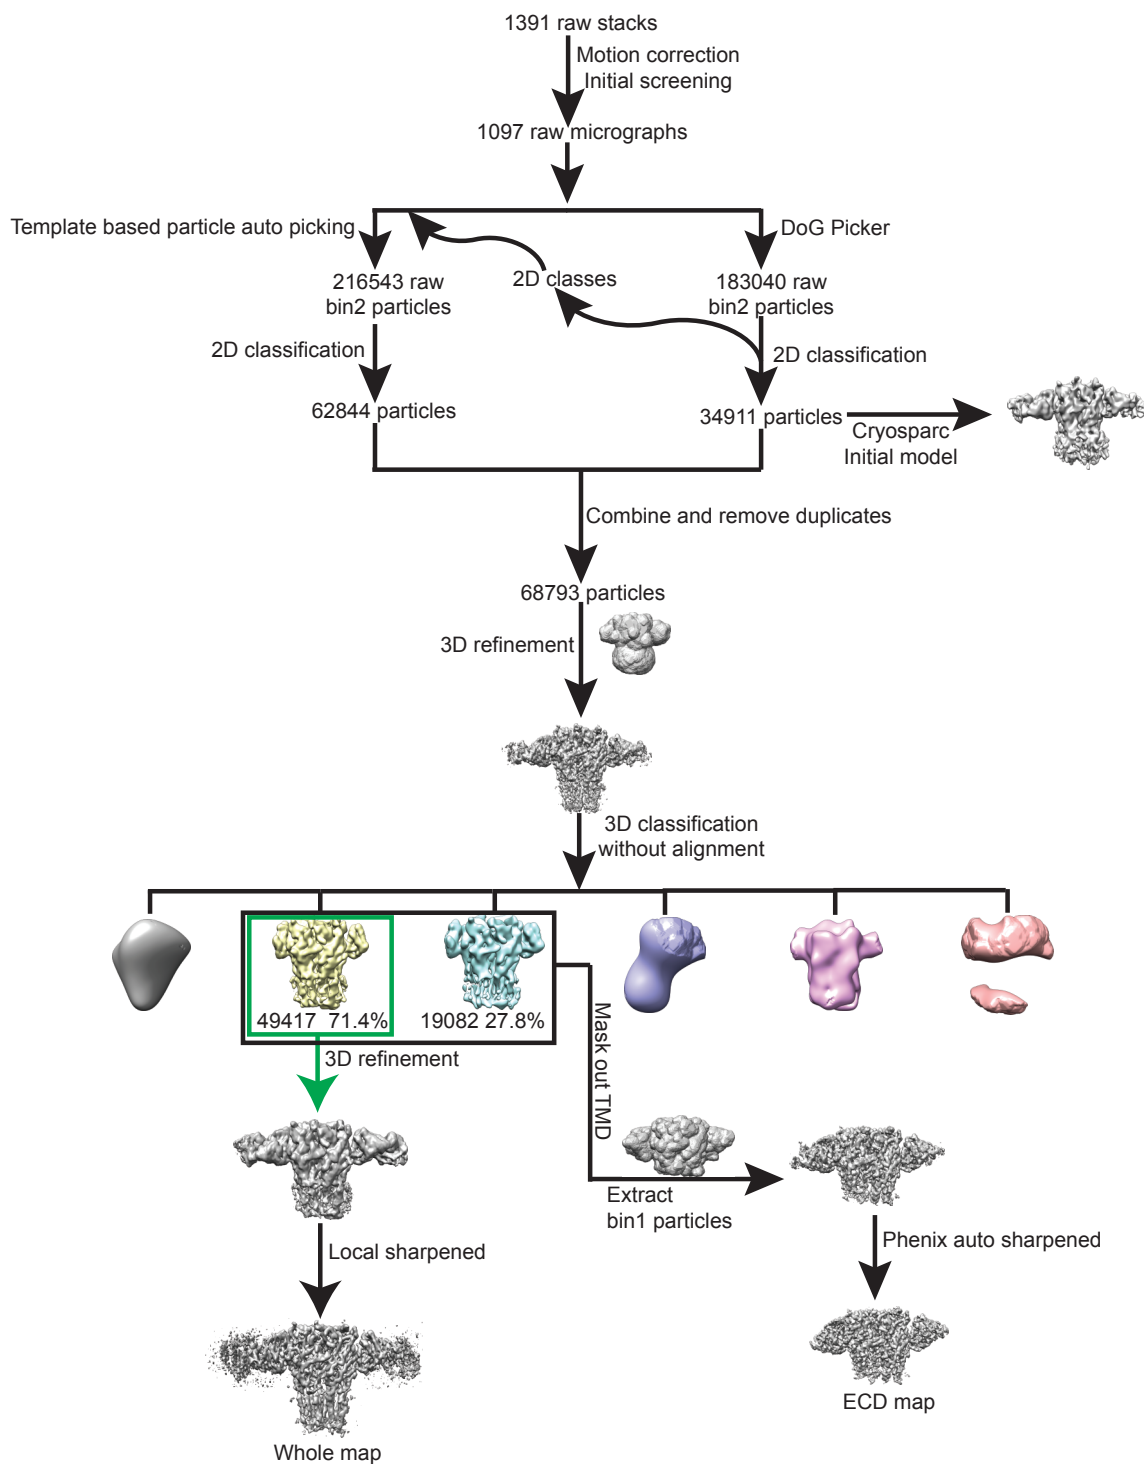

Figure 1-figure supplement 4

Supplement: supp [file elife-39383-supp-v1.zip]

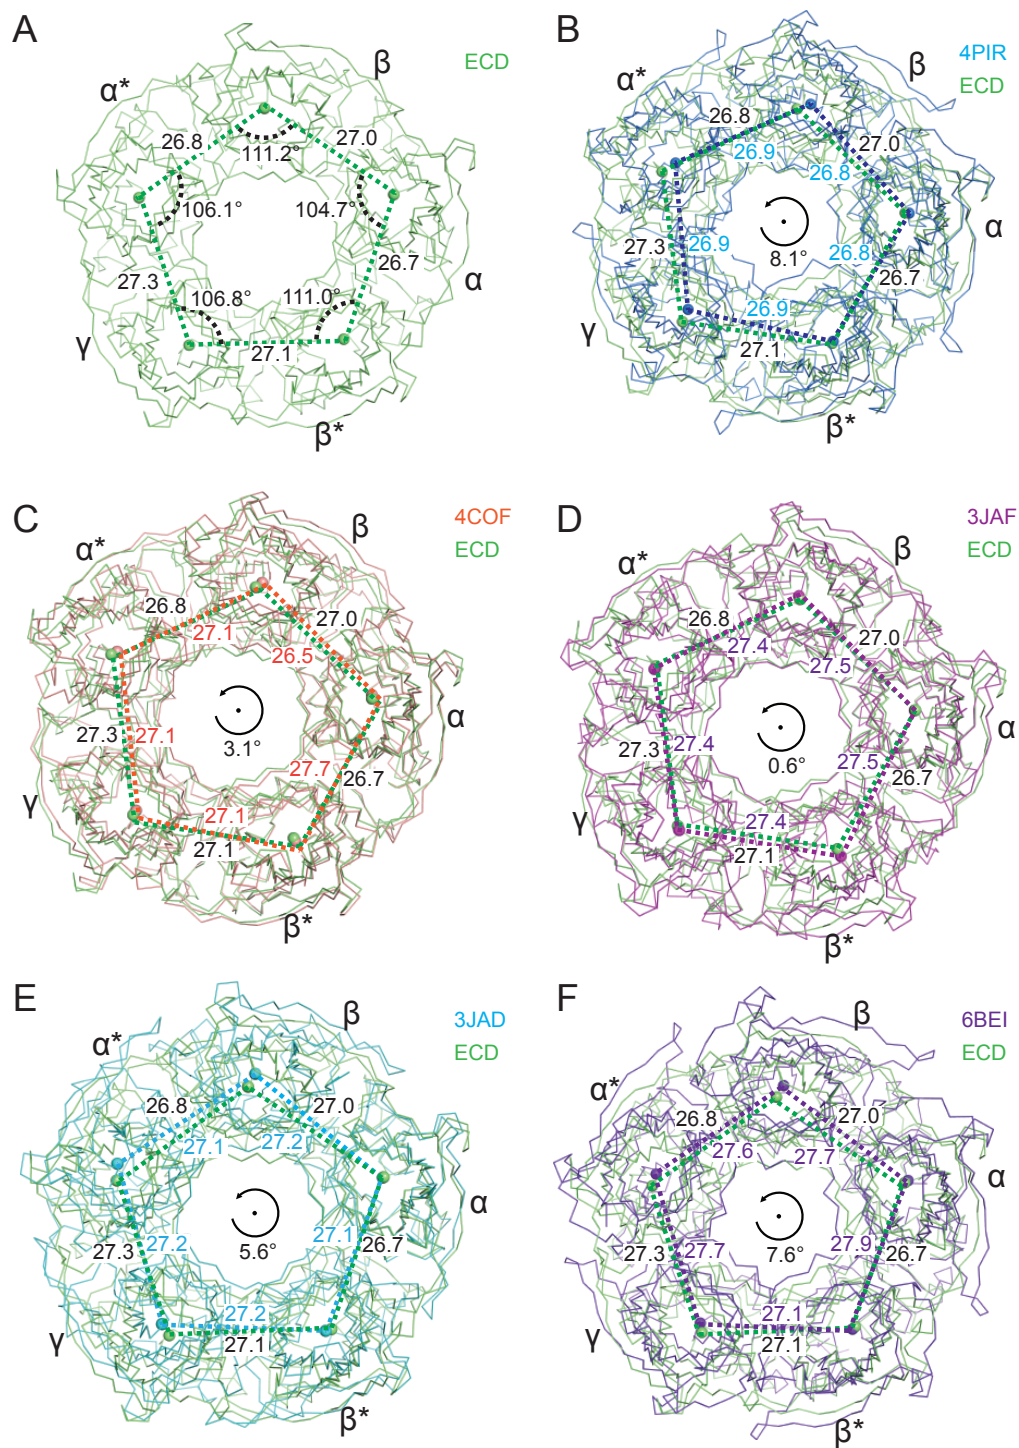

Figure 3-figure supplement 1

Supplement: supp [file elife-39383-supp-v1.zip]

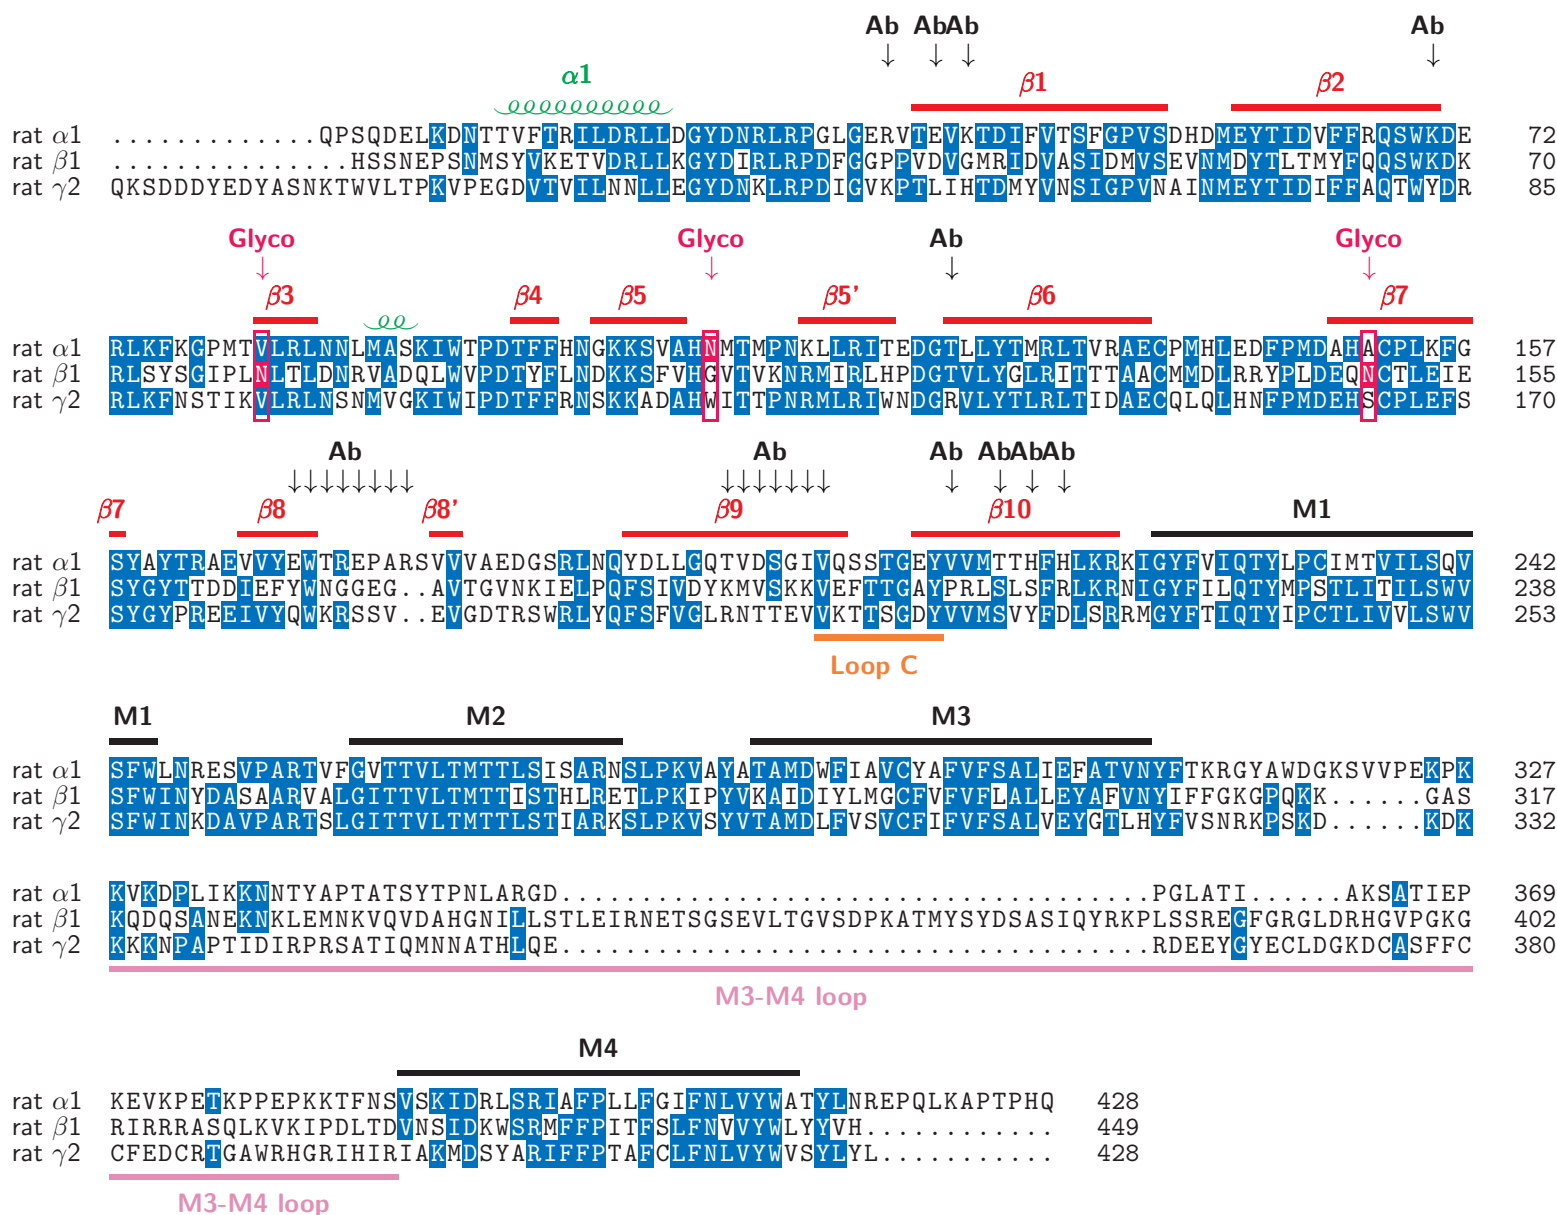

Figure 1-figure supplement 7

Supplement: supp [file elife-39383-supp-v1.zip]

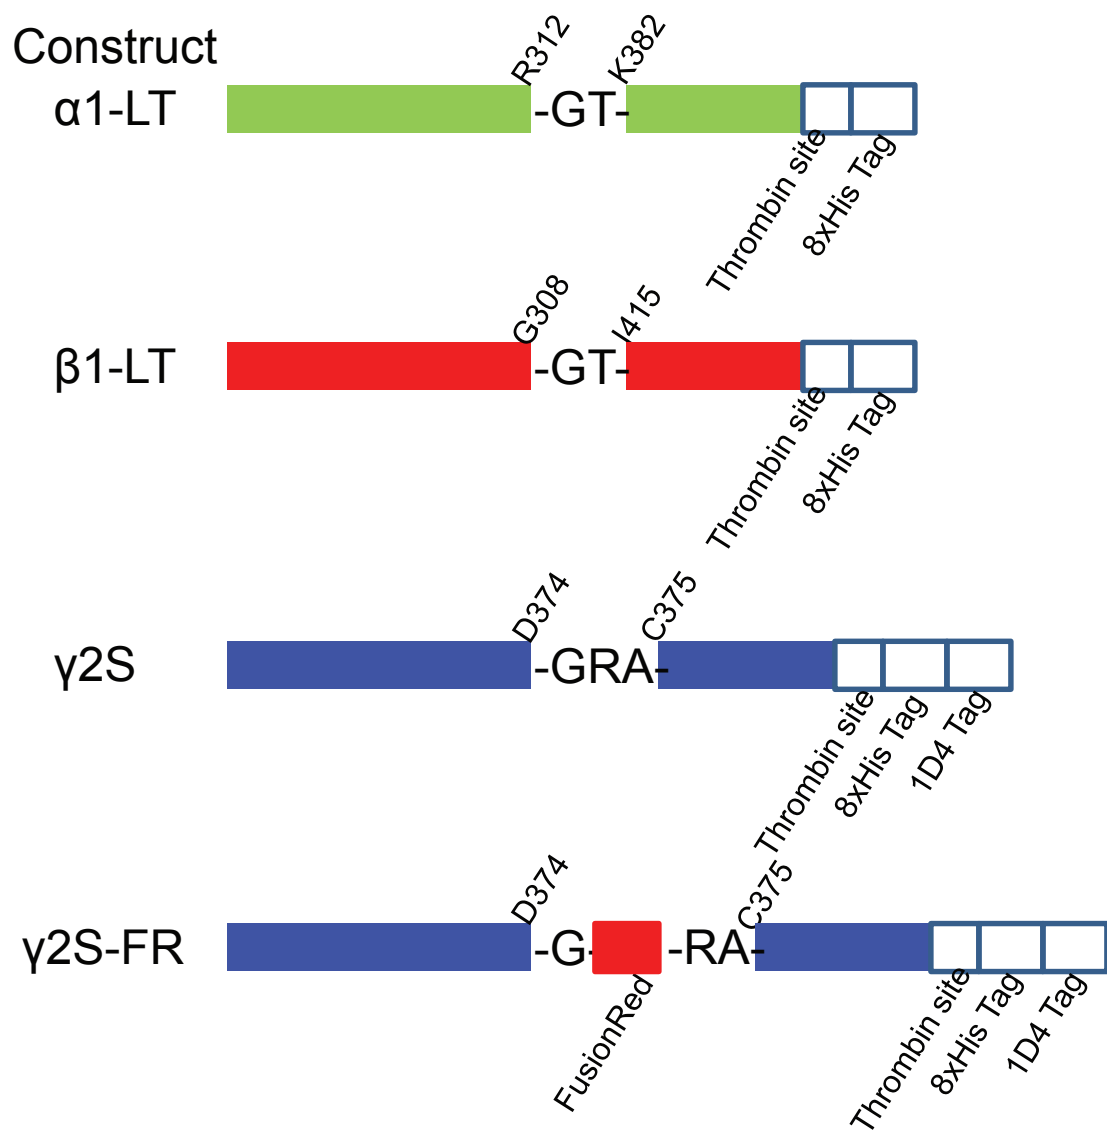

Figure 1-figure supplement 1

Supplement: supp [file elife-39383-supp-v1.zip]

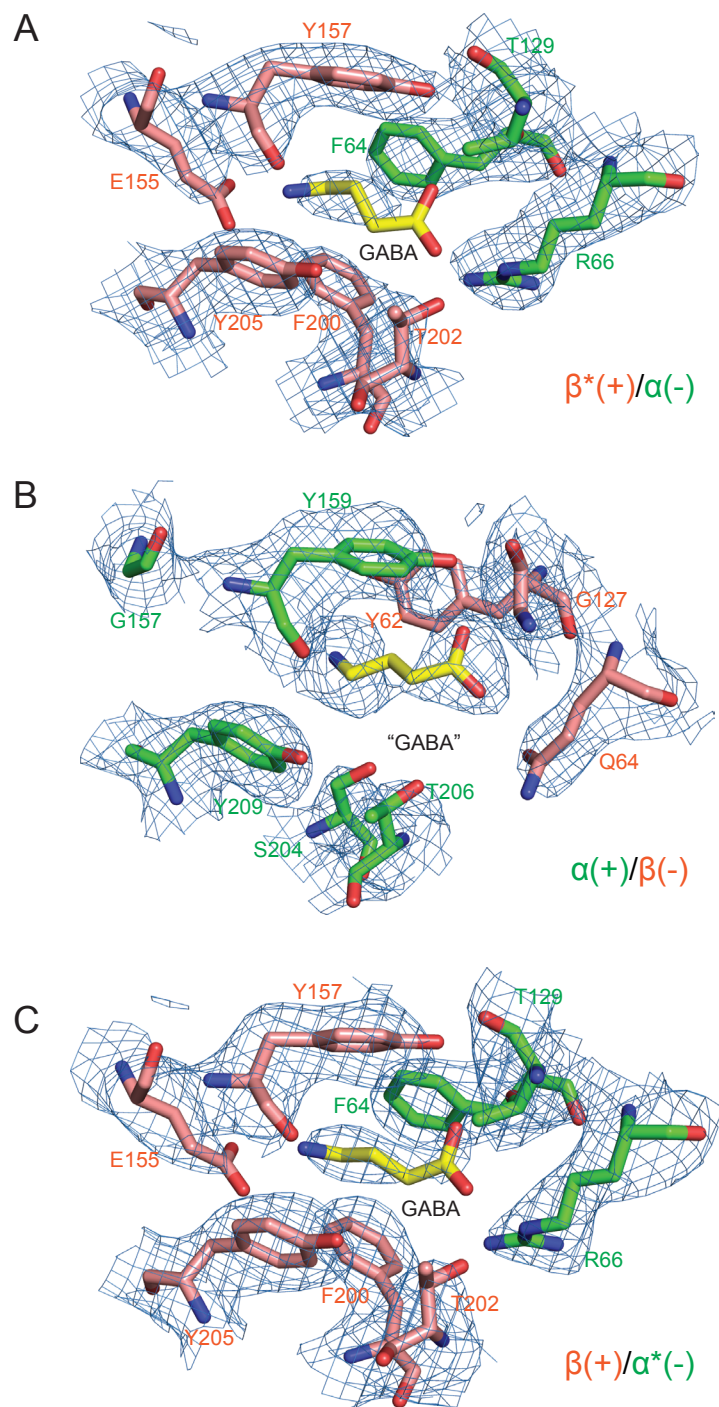

Figure 3-figure supplement 2

Supplement: supp [file elife-39383-supp-v1.zip]

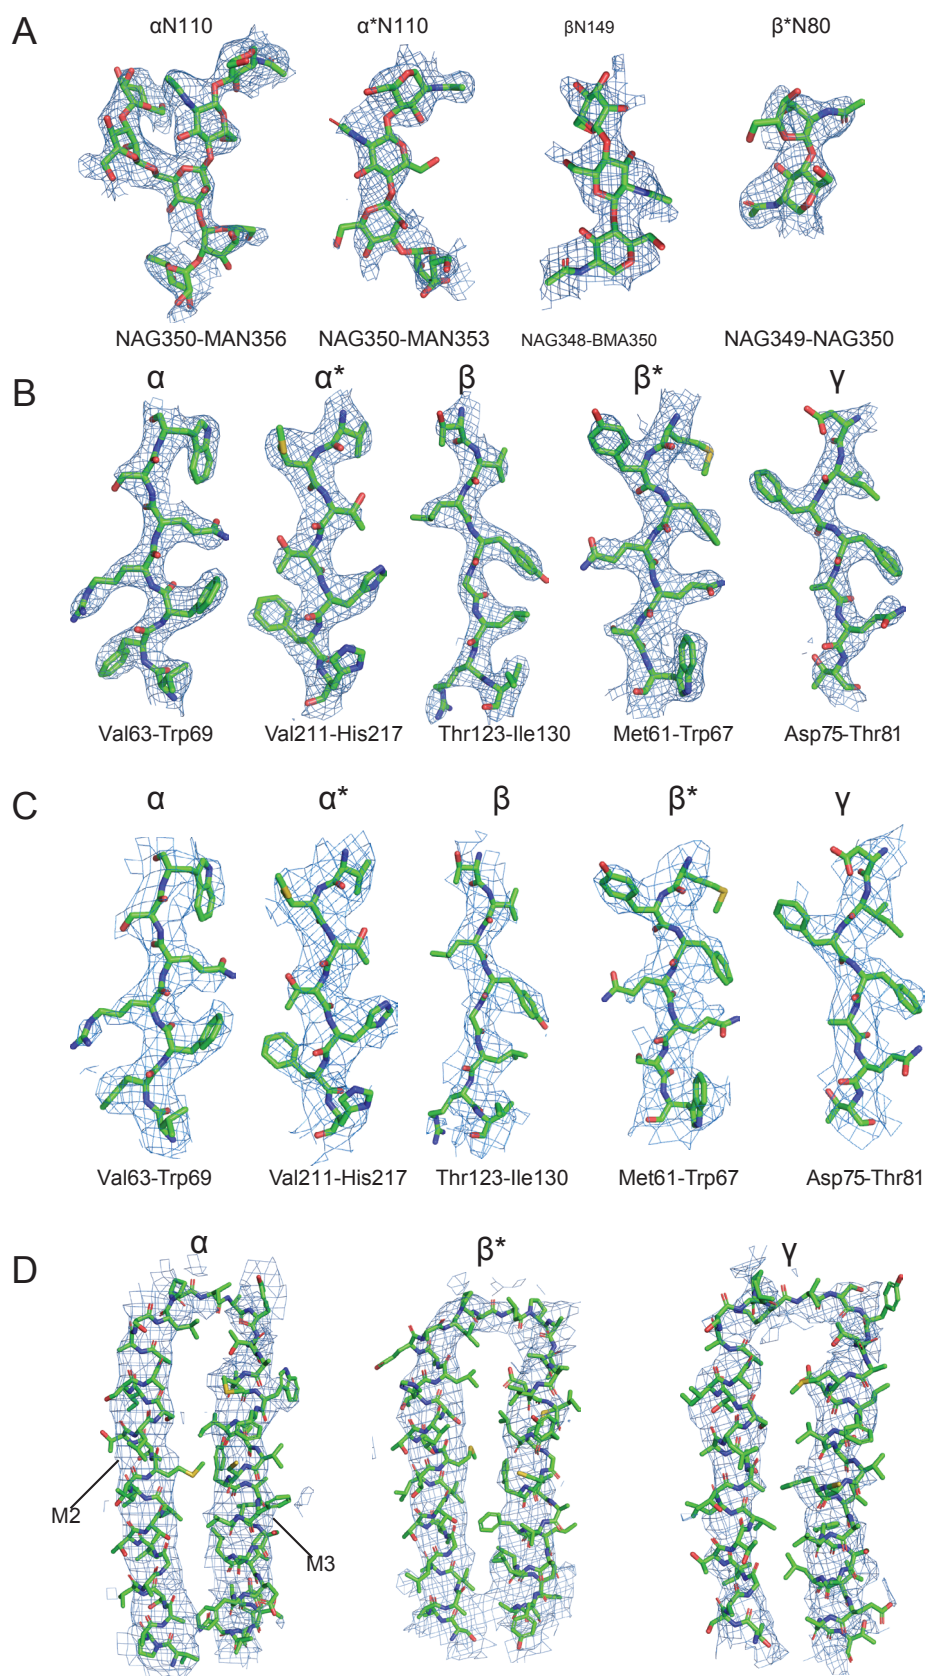

Figure 1-figure supplement 6

Supplement: supp [file elife-39383-supp-v1.zip]

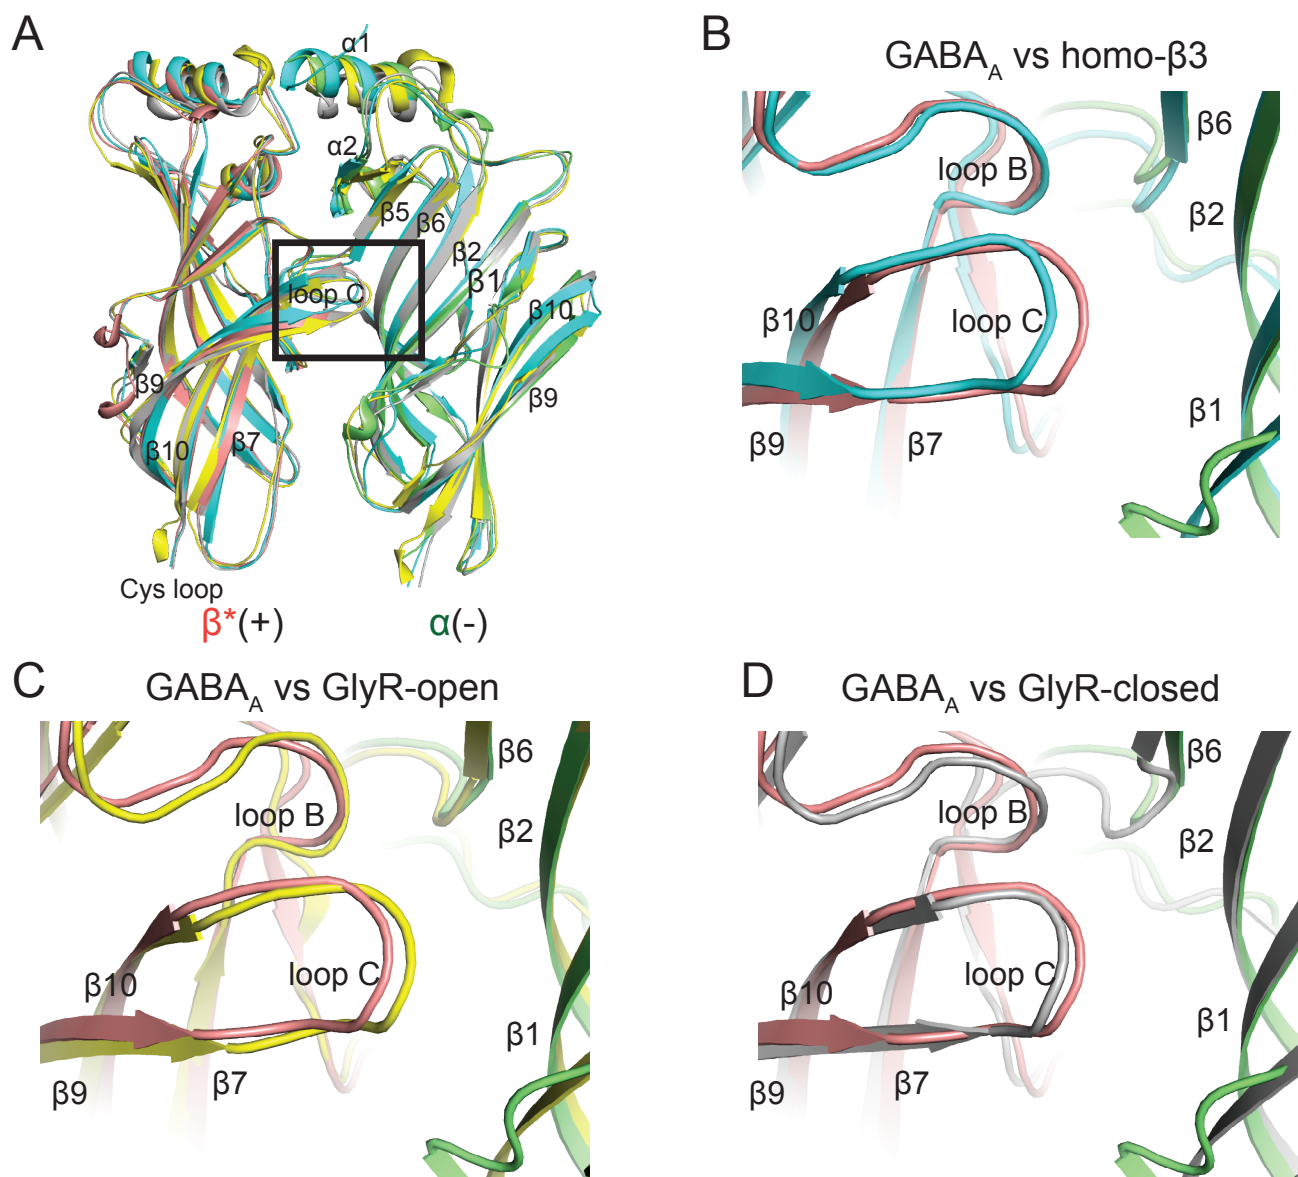

Figure3-figure supplement 4

Supplement: supp [file elife-39383-supp-v1.zip]

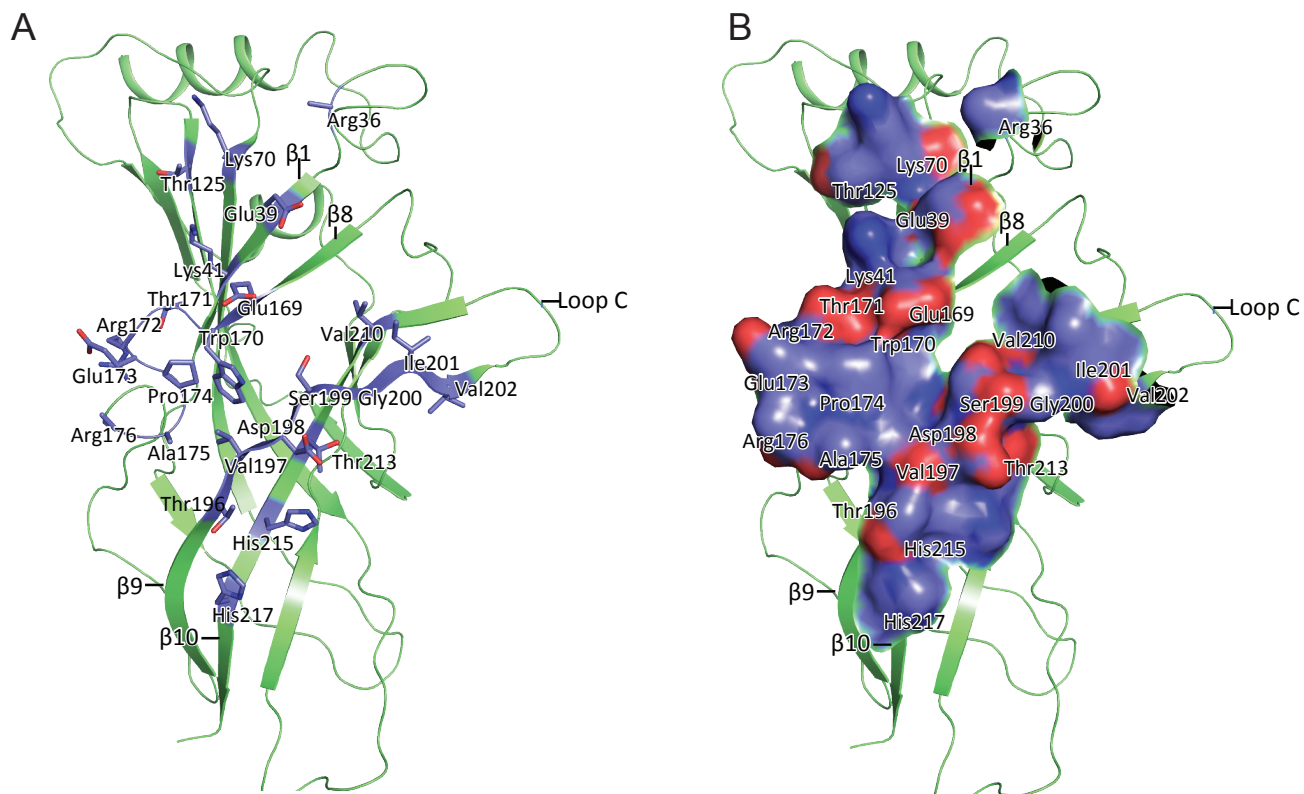

Figure 1-figure supplement 8

Supplement: supp [file elife-39383-supp-v1.zip]

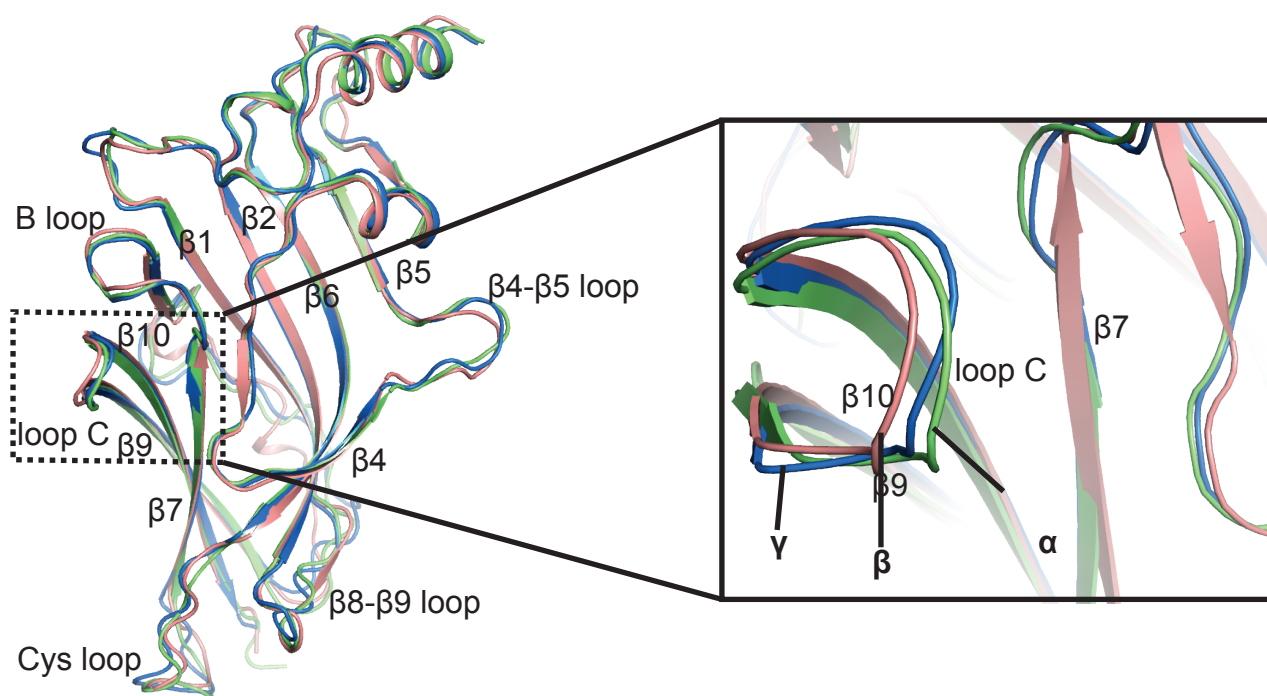

figure3-figuresupplement\_3

Supplement: supp [file elife-39383-supp-v1.zip]
